# Supplementary material
Source: MDPI journal article supplement (https://www.mdpi.com/1424-2818/13/8/354)
Supplement: s1 [file s1]

Details of accessions included in Lopez-Anido 2017 study

| Species                             | Tripartite code <sup>1</sup> | Accession number from source Genbank <sup>2</sup> | Name in passport data <sup>3</sup> | Cultivar-group <sup>4</sup> | Country / province <sup>5</sup> | Source <sup>6</sup> | Include in molecular evaluation |
|-------------------------------------|------------------------------|---------------------------------------------------|------------------------------------|-----------------------------|---------------------------------|---------------------|---------------------------------|
| <i>C. maxima</i> ssp. <i>maxima</i> | 104Lus                       |                                                   | Pink Banana                        | Banana                      | USA                             | Sieger              | yes                             |
|                                     | 120Lus                       | MAX 517                                           | Amer Indian                        | Banana                      | USA                             | IPK                 | no                              |
|                                     | 146Lar                       |                                                   | Zapuco INTA                        | Banana                      | Argentina                       | INTA                | yes                             |
|                                     | 118Lunk                      | MAX 90                                            | Raketa 38-1                        | Banana                      | -                               | IPK                 | no                              |
|                                     | 3Bar                         | PI 458703                                         |                                    | Buttercup                   | Argentina                       | NE 9                | yes                             |
|                                     | 95Bus                        |                                                   | Buttercup                          | Buttercup                   | USA                             | Stokes              | yes                             |
|                                     | 98Bus                        |                                                   | Autumn Cups                        | Buttercup                   | USA                             | Stokes              | yes                             |
|                                     | 80Bus                        | PI 224669                                         | B. Butter                          | Buttercup                   | USA                             | NE 9                | no                              |
|                                     | 117Bus                       | MAX 515                                           | Perfection                         | Buttercup                   | USA                             | IPK                 | no                              |
|                                     | 56Bsd                        | PI 234608                                         | Queen Blue                         | Buttercup                   | South Africa                    | NE 9                | yes                             |
|                                     | 6Har                         | PI 458714                                         |                                    | Hubbard                     | Argentina                       | NE 9                | no                              |
|                                     | 52Har                        | PI 458699                                         | Campana Lb 70                      | Hubbard                     | Argentina                       | NE 9                | yes                             |
|                                     | 58Har                        | PI 458669                                         | Hubbard Rojo                       | Hubbard                     | Argentina                       | NE 9                | yes                             |
|                                     | 76Har                        | PI 458700                                         | Campana Inglés                     | Hubbard                     | Argentina                       | NE 9                | no                              |
|                                     | 144Har                       |                                                   | Trompo Ceballos                    | Hubbard                     | Argentina                       | CP                  | no                              |
|                                     | 60Hau                        | PI 295342                                         | But Pump.                          | Hubbard                     | Australia                       | NE 9                | yes                             |
|                                     | 68Hbo                        | PI 349347                                         |                                    | Hubbard                     | Bolivia                         | NE 9                | no                              |
| <i>C. maxima</i> ssp. <i>maxima</i> | 114Hbr                       |                                                   | Kururu                             | Hubbard                     | Brazil                          | Feltrin             | yes                             |
|                                     | 94Hus                        |                                                   | Mini Green                         | Hubbard                     | USA                             | Stokes              | no                              |
|                                     | 99Hus                        |                                                   | Golden Delicious                   | Hubbard                     | USA                             | Stokes              | yes                             |

|  |        |           |                |         |           |         |     |
|--|--------|-----------|----------------|---------|-----------|---------|-----|
|  | 100Hus |           | New Eng Blue   | Hubbard | USA       | Stokes  | no  |
|  | 102Hus |           | Golden Hubb.   | Hubbard | USA       | Stokes  | no  |
|  | 105Hus |           | Blue Eng.      | Hubbard | USA       | Sieger  | no  |
|  | 107Hus |           | Golden Hubbard | Hubbard | USA       | Sieger  | no  |
|  | 186Hus | MAX 198   | N. E. Blue     | Hubbard | USA       | IPK     | yes |
|  | 212Hpe | MAX 622   | Zap. Macre     | Hubbard | Peru      | IPK     | yes |
|  | 45Mar  | PI 458705 |                | Moranga | Argentina | NE 9    | no  |
|  | 74Mar  | PI 458672 | Zapallo        | Moranga | Argentina | NE 9    | yes |
|  | 20Mbr  | PI 244702 | Moranga        | Moranga | Brazil    | NE 9    | yes |
|  | 78Mbr  | PI 244704 | Ovo ganzo      | Moranga | Brazil    | NE 9    | yes |
|  | 113Mbr |           | Exposicao      | Moranga | Brazil    | Feltrin | yes |
|  | 152Msp | V-CU-130  |                | Moranga | Spain     | Comav   | yes |
|  | 46Nar  | PI 458694 | Taplop         | Nugget  | Argentina | NE 9    | yes |
|  | 53Nus  | PI 318417 |                | Nugget  | USA       | NE 9    | no  |
|  | 59Nus  | PI 318419 |                | Nugget  | USA       | NE 9    | yes |
|  | 61Nus  | PI 318415 |                | Nugget  | USA       | NE 9    | no  |
|  | 64Nus  | PI 318416 |                | Nugget  | USA       | NE 9    | yes |
|  | 75Nus  | PI 318429 |                | Nugget  | USA       | NE 9    | no  |
|  | 82Nus  | PI 325133 | Goldnugget     | Nugget  | USA       | NE 9    | yes |
|  | 87Nus  | PI 318420 |                | Nugget  | USA       | NE 9    | no  |

|                              |        |           |                |        |           |         |     |
|------------------------------|--------|-----------|----------------|--------|-----------|---------|-----|
| <i>C. maxima ssp. maxima</i> | 101Nus |           | Ambercup       | Nugget | USA       | Stokes  | no  |
|                              | 103Nus |           | Golden Nugget  | Nugget | USA       | Sieger  | yes |
|                              | 124Nus | MAX 307   | Gold Nugget    | Nugget | USA       | IPK     | yes |
|                              | 4Par   | PI 458702 | Plomo Ruso     | Plomo  | Argentina | NE 9    | no  |
|                              | 5Par   | PI 458661 | Zapallo        | Plomo  | Argentina | NE 9    | no  |
|                              | 9Par   | PI 458660 | Zapallo        | Plomo  | Argentina | NE 9    | yes |
|                              | 11Par  | PI 458666 | Zapallo        | Plomo  | Argentina | NE 9    | yes |
|                              | 18Par  | PI 458663 | Zapallo        | Plomo  | Argentina | NE 9    | no  |
|                              | 26Par  | PI 162669 | Valenciano     | Plomo  | Argentina | NE 9    | no  |
|                              | 27Par  | PI 458665 | Zapallo        | Plomo  | Argentina | NE 9    | no  |
|                              | 37Par  | PI 458691 | Marino Mendoza | Plomo  | Argentina | NE 9    | no  |
|                              | 44Par  | PI 458670 | Zapallo        | Plomo  | Argentina | NE 9    | no  |
|                              | 143Par |           | Río Ceballos   | Plomo  | Argentina | FLA     | no  |
|                              | 153Par |           | Gris Plomo     | Plomo  | Argentina | CAPS    | no  |
|                              | 36Pbo  | PI 349349 | Zapallo        | Plomo  | Bolivia   | NE 9    | yes |
|                              | 109Pbr |           | Crioulo Pataka | Plomo  | Brazil    | Feltrin | yes |
|                              | 28Ppe  | PI 470933 | Zap. Grande    | Plomo  | Peru      | NE 9    | no  |
|                              | 63Psp  | PI 512699 |                | Plomo  | Spain     | NE 9    | no  |
|                              | 69Ptk  | PI 458653 | Kus            | Plomo  | Turkey    | NE 9    | no  |
|                              | 70Ptk  | PI 171618 | Kestane        | Plomo  | Turkey    | NE 9    | no  |

|                              |        |           |                |         |              |        |     |
|------------------------------|--------|-----------|----------------|---------|--------------|--------|-----|
| <i>C. maxima ssp. maxima</i> | 71Ptk  | PI 177365 | Helvaci        | Plomo   | Turkey       | NE 9   | no  |
|                              | 54Pin  | PI 174181 | Balka Bagi     | Plomo   | India        | NE 9   | no  |
|                              | 72Pau  | PI 234609 | Queen Blue     | Plomo   | Australia    | NE 9   | yes |
|                              | 116Psd |           | Star 7024      | Plomo   | South Africa | Star   | yes |
|                              | 10Sar  | PI 162671 | Forrajero      | Show    | Argentina    | NE 9   | no  |
|                              | 190Sar | MAX 79    |                | Show    | Argentina    | IPK    | yes |
|                              | 214Sch | MAX 630   | Kurb Garten    | Show    | Chile        | IPK    | yes |
|                              | 213Smx | MAX 629   | Mayo Blush     | Show    | Mexico       | IPK    | yes |
|                              | 96Sus  |           | Dill's Giant   | Show    | USA          | Stokes | no  |
|                              | 90Ssp  | V-CU-170  |                | Show    | Spain        | Comav  | yes |
|                              | 91Ssp  | CL-CU-7   |                | Show    | Spain        | Comav  | yes |
|                              | 176Shu | MAX 513   |                | Show    | Hungary      | IPK    | yes |
|                              | 42Tar  | PI 458684 | Alayo          | Turbant | Argentina    | NE 9   | yes |
|                              | 108Tar |           | Turb Cor       | Turbant | Argentina    | FLA    | no  |
|                              | 196Tus | MAX 216   |                | Turbant | USA          | IPK    | no  |
|                              | 97Tus  |           | Aladdin Turban | Turbant | USA          | Stokes | yes |
|                              | 106Tus |           | Turks Turban   | Turbant | USA          | Sieger | yes |
|                              | 89Tsp  | AN-CU-117 |                | Turbant | Spain        | Comav  | yes |
|                              | 147Tsp | CA-CU-138 |                | Turbant | Spain        | Comav  | yes |
|                              | 195Tit | MAX 211   |                | Turbant | Italy        | IPK    | yes |

|                              |        |           |             |           |           |          |     |
|------------------------------|--------|-----------|-------------|-----------|-----------|----------|-----|
| <i>C. maxima ssp. maxima</i> | 192Tsy | MAX 144   |             | Turbant   | Syria     | IPK      | no  |
|                              | 8Zar   | PI 458676 | Supua       | Zapallito | Argentina | NE 9     | no  |
|                              | 15Zar  | PI 458683 | Vistalba    | Zapallito | Argentina | NE 9     | yes |
|                              | 16Zar  | PI 458690 | Chacoriano  | Zapallito | Argentina | NE 9     | yes |
|                              | 19Zar  | PI 458685 | Antón       | Zapallito | Argentina | NE 9     | no  |
|                              | 22Zar  | PI 458698 | Zap Tronco  | Zapallito | Argentina | NE 9     | no  |
|                              | 24Zar  | PI 458675 | Nacalo      | Zapallito | Argentina | NE 9     | no  |
|                              | 33Zar  | PI 458678 | Tanca       | Zapallito | Argentina | NE 9     | no  |
|                              | 34Zar  | PI 458674 | Lampa       | Zapallito | Argentina | NE 9     | yes |
| <i>C. maxima ssp. maxima</i> | 38Zar  | PI 458688 | Maguilta    | Zapallito | Argentina | NE 9     | no  |
|                              | 39Zar  | PI 458680 | Maluen      | Zapallito | Argentina | NE 9     | no  |
|                              | 40Zar  | PI 458704 |             | Zapallito | Argentina | NE 9     | no  |
|                              | 41Zar  | PI 458695 | Sayanca     | Zapallito | Argentina | NE 9     | no  |
|                              | 79Zar  | PI 458677 | Sipigua     | Zapallito | Argentina | NE 9     | yes |
|                              | 155Zar |           | Zapallito   | Zapallito | Argentina | F. Morse | no  |
|                              | 156Zar |           | Clarísimo   | Zapallito | Argentina | CAPS     | no  |
|                              | 158Zar |           | Zap. Tronco | Zapallito | Argentina | SAIS     | no  |
|                              | 159Zar |           | Veronés     | Zapallito | Argentina | INTA     | yes |
|                              | 217Zar |           | T. Magnif   | Zapallito | Argentina | Guasch   | no  |
|                              | 123Zur | MAX 302   | Zap. Tronco | Zapallito | Uruguay   | IPK      | yes |

|                              |        |           |             |           |           |         |     |
|------------------------------|--------|-----------|-------------|-----------|-----------|---------|-----|
|                              | 93Zbr  |           | Abob tronco | Zapallito | Brazil    | Feltrin | yes |
|                              | 29Kar  | PI 414676 | Zapinski    | Zipinka   | Argentina | NE 9    | yes |
|                              | 35Kar  | PI 458701 | Z. Campana  | Zipinka   | Argentina | NE 9    | yes |
|                              | 185Kar | MAX 306   | Zip Camp.   | Zipinka   | Argentina | IPK     | yes |
|                              | 211Kar | MAX 621   | B. Zipinki  | Zipinka   | Argentina | IPK     | yes |
|                              | 13ar   | PI 458708 |             | -         | Argentina | NE 9    | no  |
|                              | 14ar   | PI 458710 |             | -         | Argentina | NE 9    | no  |
| <i>C. maxima ssp. maxima</i> | 49ar   | PI 458687 | Choay       | -         | Argentina | NE 9    | no  |
|                              | 50ar   | PI 458686 | Chinque     | -         | Argentina | NE 9    | no  |
|                              | 51ar   | PI 458679 | Relanta     | -         | Argentina | NE 9    | no  |
|                              | 81ar   | PI 458709 |             | -         | Argentina | NE 9    | no  |
|                              | 84ar   | PI 458664 | Zapallo     | -         | Argentina | NE 9    | no  |
|                              | 142ar  |           | Pecas INTA  | -         | Argentina | INTA    | no  |
|                              | 219bo  | PI 518681 | Zapallo     | -         | Bolivia   | NE 9    | yes |
|                              | 220bo  | PI 543227 | Joco Jemi   | -         | Bolivia   | NE 9    | yes |
|                              | 221bo  | PI 560947 | Joco        | -         | Bolivia   | NE 9    | no  |
|                              | 17pa   | PI 475748 | Zapallo     | -         | Paraguay  | NE 9    | yes |
|                              | 30pa   | PI 458741 |             | -         | Paraguay  | NE 9    | yes |
|                              | 32pa   | PI 475749 | Zapallo     | -         | Paraguay  | NE 9    | yes |
|                              | 83pa   | PI 458742 | Zapallo     | -         | Paraguay  | NE 9    | yes |

|                              |         |           |               |   |           |         |     |
|------------------------------|---------|-----------|---------------|---|-----------|---------|-----|
|                              | 111br   |           | Coroa         | - | Brazil    | Feltrin | no  |
|                              | 1ch     | PI 349354 |               | - | Chile     | NE 9    | yes |
|                              | 127ch   | MAX 15    | Chilen Kurbis | - | Chile     | IPK     | no  |
|                              | 7pe     | PI215750  | Macre         | - | Peru      | NE 9    | yes |
|                              | 131pe   | MAX 192   | Zap. Mace 2   | - | Peru      | IPK     | yes |
| <i>C. maxima ssp. maxima</i> | 198us   | PI 165558 | Kadu          |   | USA       | NE 9    | yes |
|                              | 66sp    | PI 512714 |               | - | Spain     | NE 9    | no  |
|                              | 88sp    | CM-CU-33  |               | - | Spain     | Comav   | no  |
|                              | 149sp   | V-CU-140  |               | - | Spain     | Comav   | no  |
|                              | 150sp   | B-CU-30   |               | - | Spain     | Comav   | no  |
|                              | 151sp   | B-CU-11   |               | - | Spain     | Comav   | no  |
|                              | 57ni    | PI 188694 |               | - | Niger     | NE 9    | no  |
|                              | 67ir    | PI 137866 |               | - | Iran      | NE 9    | no  |
|                              | 77ir    | PI 141636 | Kaduetambl    | - | Iran      | NE 9    | no  |
|                              | 62rs    | PI 260652 |               | - | Russia    | NE 9    | no  |
|                              | 65cn    | PI 92865  | Nan Kwa       | - | China     | NE 9    | yes |
|                              | 129unk  | MAX 24    | Ovo Ganso     | - | -         | IPK     | yes |
|                              | 43Aba   | PI 458659 |               |   | Bs. Aires | NE 9    | yes |
|                              | 125Asl  | MAX 66    | Sacha Zapa    |   | San Luís  | IPK     | yes |
|                              | 128Aunk | MAX 71    | (andreana)    |   | Argentina | IPK     | no  |

|                                       |        |           |                 |  |             |         |     |
|---------------------------------------|--------|-----------|-----------------|--|-------------|---------|-----|
| <i>C. maxima</i> spp. <i>andreana</i> | 130Aer | MAX 81    | Entre Rios      |  | Entre Ríos  | IPK     | yes |
|                                       | 132Aco |           | Caroya Bulk     |  | Córdoba     | FLA     | no  |
|                                       | 133Aco |           | St Dom. I       |  | Córdoba     | FLA     | no  |
|                                       | 134Aco |           | St Dom. II      |  | Córdoba     | FLA     | no  |
|                                       | 135Asf |           | Chapuy          |  | Santa Fe    | FLA     | no  |
|                                       | 136Ast |           | La Huerta       |  | S. del Est. | FLA     | yes |
|                                       | 137Asl |           | Concarán        |  | San Luís    | LA      | no  |
|                                       | 138Asf |           | Zav A012        |  | Santa Fe    | FLA     | no  |
| <i>C. maxima</i> spp. <i>andreana</i> | 139Aba |           | Cnel. Suár.     |  | Bs. Aires   | FLA     | no  |
|                                       | 140Ast |           | Bandera 45      |  | S. del Est. | FLA     | yes |
|                                       | 141Ast |           | Bandera         |  | S. del Est. | FLA     | yes |
|                                       | 160Aco | PI 629254 | Andreana        |  | Córdoba     | NE 9    | yes |
|                                       | 174Aco |           | Las Varillas    |  | Córdoba     | FLA     | no  |
|                                       | 175Ast |           | Linares         |  | S. del Est. | FLA     | no  |
|                                       | 178Aus | MAX 80    |                 |  | EEUU        | IPK     | yes |
|                                       | 199Aco |           | Despeñaderos    |  | Córdoba     | FLA     | no  |
|                                       | 201Asl |           | Las Quijadas    |  | San Luís    | FLA     | no  |
|                                       | 202Aer |           | Rincón del Doll |  | Entre Ríos  | FLA     | no  |
|                                       | 218Aba | PI 458653 | Lag. Esquivel   |  | Bs. Aires   | NE 9    | no  |
|                                       | 110Cbr |           | Nova Caravela   |  | Brazil      | Feltrin | no  |



|                        |        |           |              |  |           |         |     |
|------------------------|--------|-----------|--------------|--|-----------|---------|-----|
| <i>C. moschata</i>     | 112Cbr |           | Pira Moita   |  | Brazil    | Feltrin | no  |
|                        | 163Cbo | PI 543228 |              |  | Bolivia   | SE 7    | yes |
|                        | 164Cpa | PI 458743 | Andai Ysis   |  | Paraguay  | SE 7    | no  |
|                        | 167Cbo | PI 543218 |              |  | Bolivia   | SE 7    | no  |
|                        | 168Cbo | PI 560946 | Joco         |  | Bolivia   | SE 7    | no  |
|                        | 169Cpa | PI 162889 |              |  | Paraguay  | SE 7    | yes |
| <i>C. argyrosperma</i> | 162Yar | PI 458725 |              |  | Argentina | SE 7    | yes |
|                        | 165Yar | PI 458722 |              |  | Argentina | SE 7    | yes |
| <i>C. ficifolia</i>    | 222Far |           | Marchionni   |  | Argentina | FLA     | no  |
| <i>C. ecuadorensis</i> | 161Rec | Grif 9446 |              |  | Ecuador   | SE 7    | no  |
|                        | 203Rec | PI 432441 | Bitter Flesh |  | Ecuador   | SE 7    | yes |

<sup>1</sup> For entries a tripartite abbreviation code was used, in which the number is a household accession code (see supplementary Table for details), uppercase letter refers to species other than *C. maxima* or cultivar-group in *C. maxima*, F (*C. ficifolia*), Y (*C. argyrosperma*), C (*C. moschata*), R (*C. ecuadorensis*), A (*ssp. andreana*), B (Buttercup), P (Plomo), M (Moranga), Z (Zapallito), T (Turban), S (Show), H (Hubbard), K (Zipinka), L (Banana), N (Nugget). When *C. maxima* accessions could not be assigned to any cultivar-group, uppercase letter is missing. The rest of the lower case letters in the code, refers to country of origin us (USA), ar (Argentina), pe (Peru), br (Brazil), ch (Chile), bo (Bolivia), pa (Paraguay), ur (Uruguay), ec (Ecuador), mx (Mexico), sp (Spain), it (Italy), hu (Hungary), au (Australia), sd (South Africa), cn (China), ir (Iran), ni (Nigeria), in (India), tk (Turkey), rs (Russia), sy (Syria) and unk (not specified in passport data). For Argentinian entries of *ssp. andreana* lowercase letters indicate Province of origin, st (Santiago del Estero), co (Córdoba), er (Entre Ríos), sl (San Luis), sf (Santa Fe) and ba (Buenos Aires).

<sup>2</sup> Only for those from a Genebank source.

<sup>3</sup> According to passport data from Genbank or collector.

<sup>4</sup> Cultivar group only for *C. maxima*, domesticates.

<sup>5</sup> Only for *ssp. andreana* Argentinian province of provenance.

<sup>6</sup> Genbanks: NE 9 = Northeast Regional PI Station, USDA-ARS, Geneva, USA COMAV = Instituto de Conservación y Mejora de la Agrodiversidad Valenciana, Valencia, Spain; SE 7 = Plant Genetic Conservation Unit, USDA-ARS, Griffin, USA; INTA = Instituto Nacional de Tecnología Agropecuaria, EEA La Consulta, Mendoza, Argentina; IPK = Leibniz Institute of Plant Genetics and Crop Plant Research, Gatersleben, Germany. Commercial Seeds Companies: Feltrin, Stokes, Sieger, Star, SAIS, CAPS, Ferry Morse, SAIS, Guasch. Others abbreviations: FLA = Collected by Fernando Lopez-Anido, LA = Collected by Lorena Ashworth.
